# Supplementary material for: Room-temperature synthesis, growth mechanisms and opto-electronic properties of organic–inorganic halide perovskite CH3NH3PbX3 (X = I, Br, and Cl) single crystals
Source: Royal Society of Chemistry journal article supplement (doi:10.1039/d0ce01690j), 2021-01-01
Supplement: d0ce01690j1.pdf [file d0ce01690j1.pdf]

## ARTICLE

Received 00th January 20xx,  
Accepted 00th January 20xx

DOI: 10.1039/x0xx00000x

# Supporting Information

## Room-Temperature Synthesis, Growth Mechanisms and Optical Properties of Organic-Inorganic Halide Perovskite $\text{CH}_3\text{NH}_3\text{PbX}_3$ (X= I, Br and Cl) Single Crystals

Maryam Bari <sup>a</sup>, Hua Wu <sup>b,a</sup>, Alexei A. Bokov <sup>a</sup>, Rana Faryad Ali <sup>a</sup>, Hamel N. Tailor <sup>a</sup>, Byron D. Gates <sup>a</sup>, and Zuo-Guang Ye <sup>a\*</sup>

<sup>a</sup> Department of Chemistry and 4D LABS, Simon Fraser University, Burnaby, British Columbia, V5A 1S6, Canada.

<sup>b</sup> Department of Applied Physics, Donghua University, Songjiang, Shanghai, 201620, China.

\*Corresponding Author. E-mail: zye@sfu.ca

Electronic Supplementary Information (ESI) available: [details of any supplementary information available should be included here]. See DOI: 10.1039/x0xx00000x

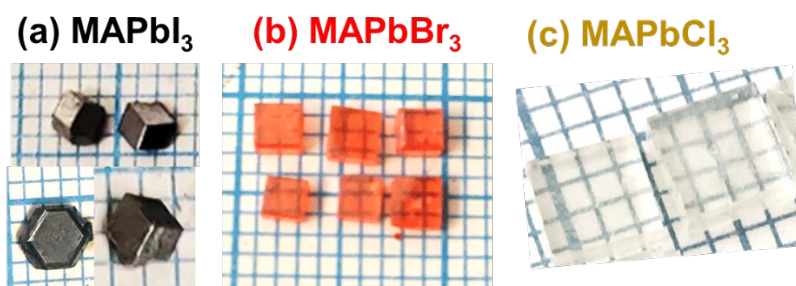

**Figure S1.** Optical images of the  $\text{MAPbX}_3$  ( $X = \text{I}, \text{Br}, \text{Cl}$ ) crystals grown by room temperature crystallization (RTC).

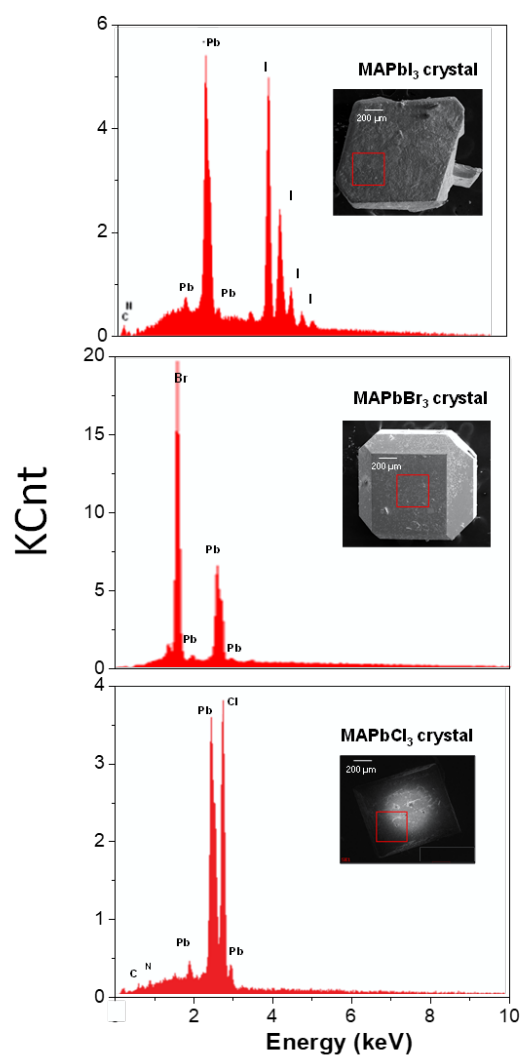

**Figure S2.** Energy dispersive X-ray spectroscopy (EDX) analyses of the  $\text{MAPbX}_3$  crystals grown by RTC.

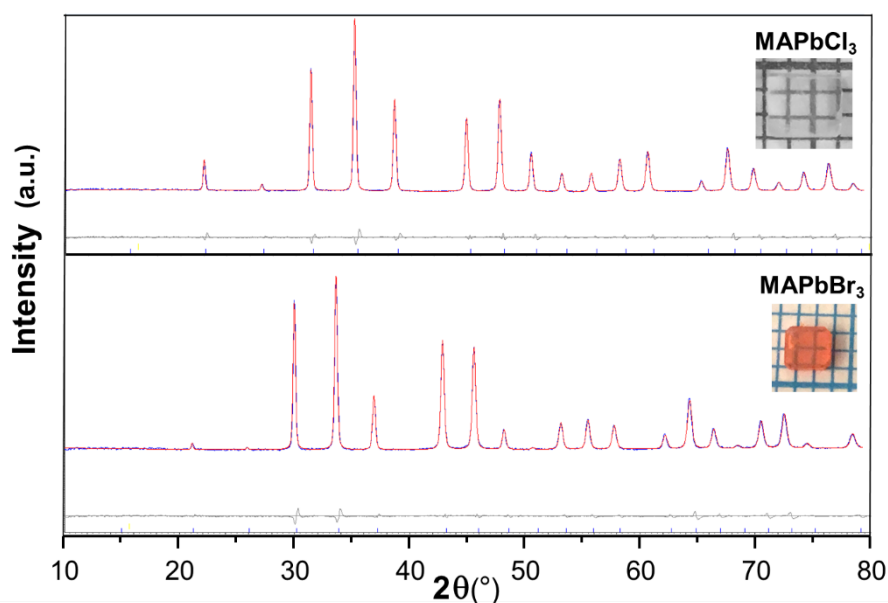

**Figure S3.** Stability study of the halide perovskite crystals grown by RTC and stored in ambient condition for two years: PXRD patterns of  $\text{MAPbX}_3$  ( $X = \text{Br}$  and  $\text{Cl}$ ) (blue line), the Pawley refinement (red line) with a profile residual factor  $R_{\text{wp}} = 0.50$  for both compounds, and the difference (grey line on the bottom of the panel).

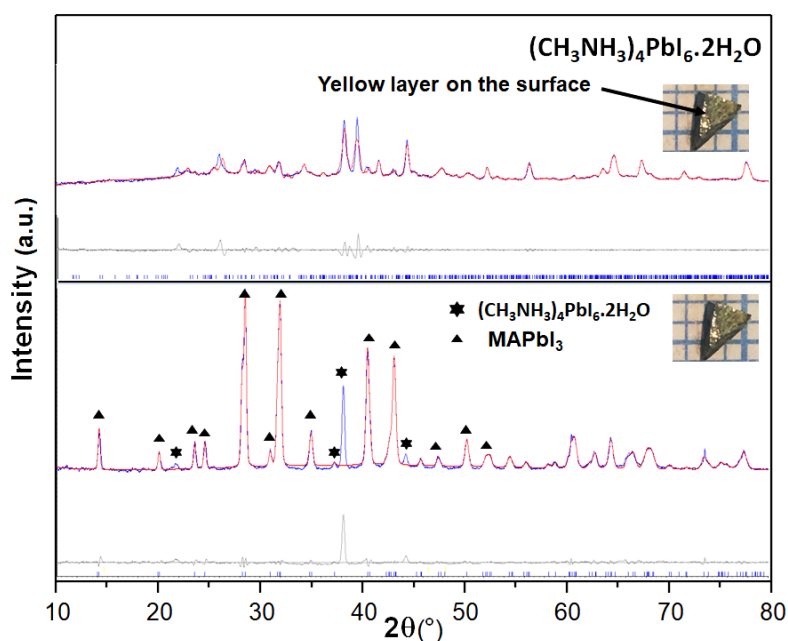

**Figure S4.** Stability study of the  $\text{MAPbI}_3$  crystals grown by RTC and stored in ambient condition for one year. Bottom: PXRD pattern of an as-grown  $\text{MAPbI}_3$  crystal containing a yellow layer formed on the crystal surface (blue line), the Pawley refinement (red line) with the profile residual factor  $R_{\text{wp}} = 1.50$  for  $\text{MAPbI}_3$ . Top: PXRD pattern of the yellow compound scratched out from the grown crystal, which matches the PXRD of  $(\text{CH}_3\text{NH}_3)_4\text{PbI}_6 \cdot 2\text{H}_2\text{O}$  with a  $R_{\text{wp}} = 0.50$ , as previously reported.<sup>1,2</sup>

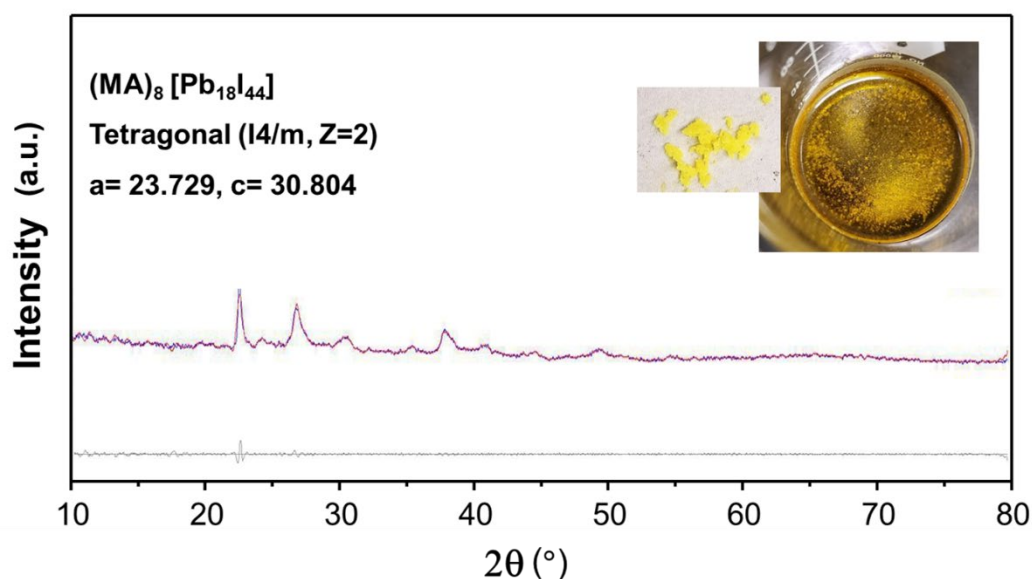

**Figure S5.** Powder XRD pattern of the yellow crystals obtained from 1 M solution of MAPbI<sub>3</sub> in GBL, which was saturated at 60 °C and cooled down to room temperature (blue line), and the Pawley refinement (red line) with the profile residual factor  $R_{wp} = 0.35$  for (MA)<sub>8</sub>[Pb<sub>18</sub>I<sub>44</sub>] intermediate adduct.<sup>3</sup>

### Calculation of the Nucleation Parameters from Interfacial Energy

Based on the homogeneous nucleation theory,<sup>4</sup> the change in Gibbs free energy ( $\Delta G$ ) for the formation of spherical nuclei can be calculated by the following equation:

$$\Delta G = -\frac{4}{3}\pi r^3 |\Delta G_v| + 4\pi r^2 \sigma, \quad (S1)$$

where  $\sigma$  is the interfacial energy,  $r$  is the nucleus radius and  $\Delta G_v$  represents the volume free energy, which can be expressed as:

$$\Delta G_v = -\left(\frac{k_B T \ln S_r}{v}\right), \quad (S2)$$

where  $v$  is the specific volume of solute,  $T$  is the temperature,  $S_r$  is the supersaturation ratio and  $k_B$  is the Boltzmann constant. Based on Eqs. (S1) and (S2), the critical nucleus radius  $r_c = -\frac{2\sigma}{\Delta G_v}$  and the critical free energy barrier ( $\Delta G_c$ ) can be determined using the following relations:

$$\frac{d(\Delta G)}{dr} = -4\pi r_c^2 |\Delta G_v| + 8\pi r_c \sigma = 0, \quad (\text{S3})$$

$$\Delta G_c = \frac{16\pi\sigma^3 v^2}{3k_B^2 T^2 (\ln S_r)^2} \quad (\text{S4})$$

According to the above equations, the nucleation parameters such as critical radius of nuclei ( $r_c$ ), Gibbs free energy per volume unit ( $\Delta G_v$ ), and critical free energy barrier ( $\Delta G_c$ ) have been calculated and the results are listed in Table 1. Figure S6 shows the critical radii of the grown MAPbCl<sub>3</sub> crystals as a function of supersaturation ratio at 25 °C and 110 °C.

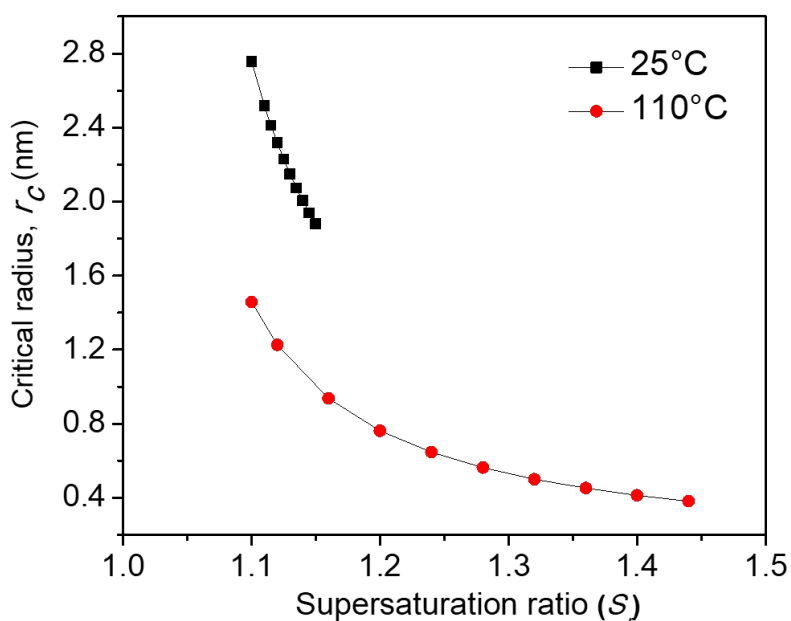

**Figure S6.** Critical radii as a function of the supersaturation ratio for the growth of MAPbCl<sub>3</sub> crystals at 25 °C and 110 °C.

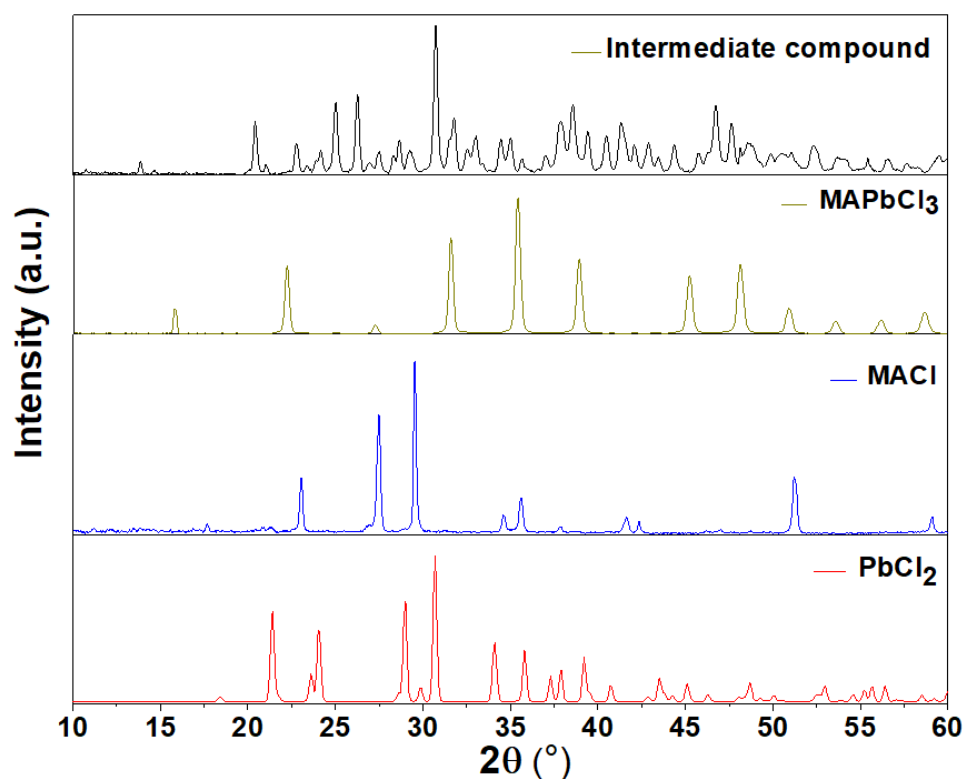

**Figure S7.** PXRD pattern of the intermediate compound formed during RTC, shown together with the patterns of pure  $\text{MAPbCl}_3$  and the precursors ( $\text{MACl}$  and  $\text{PbCl}_2$ ) as reference.

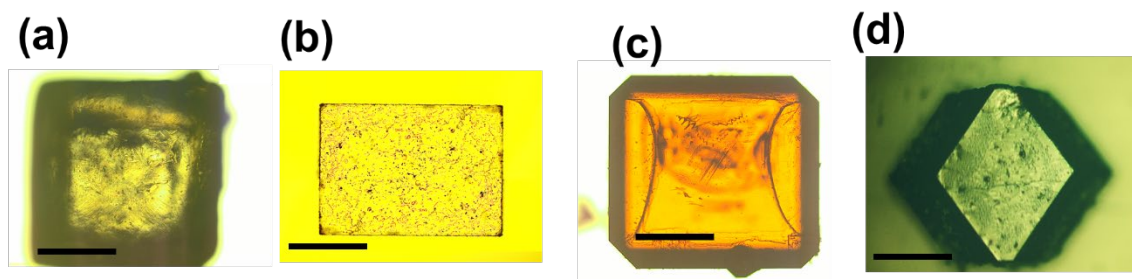

**Figure S8.** Optical micrographic images of the (001)-oriented  $\text{CH}_3\text{NH}_3\text{PbX}_3$  crystals: (a)  $\text{CH}_3\text{NH}_3\text{PbCl}_3$  crystal prepared via the seeded ITC; and (b)  $\text{CH}_3\text{NH}_3\text{PbCl}_3$  and (c)  $\text{CH}_3\text{NH}_3\text{PbBr}_3$  crystals prepared via RTC. Photographs of a-c were taken by transmitted PLM. (d)  $\text{CH}_3\text{NH}_3\text{PbI}_3$  crystal via RTC, as observed by the reflected-PLM. Scale bars: 1 mm.

**Table S1.** The fluorescence decay time of the old and fresh MAPbBr<sub>3</sub> and MAPbI<sub>3</sub> crystals acquired with a time-correlated single-photon counting (TCSPC) setup using an excitation wavelength of 370 nm. \*

| Compound                               | PL lifetime ( $\tau_1$ ) ns | $\tau_1$ contribution to PL | PL lifetime ( $\tau_2$ ) ns | $\tau_2$ contribution to PL | PL lifetime ( $\tau_3$ ) ns | $\tau_3$ contribution to PL | PL lifetime ( $\tau_4$ ) ns | $\tau_4$ contribution to PL |
|----------------------------------------|-----------------------------|-----------------------------|-----------------------------|-----------------------------|-----------------------------|-----------------------------|-----------------------------|-----------------------------|
| MAPbBr <sub>3</sub><br>(Old crystal)   | 0.2                         | 11.5%                       | 2.75                        | 12.3%                       | 22.6                        | 28%                         | 115.0                       | 48.15%                      |
| MAPbBr <sub>3</sub><br>(Fresh crystal) | 0.35                        | 10 %                        | 6.31                        | 13%                         | 47.4                        | 28 %                        | 153.3                       | 49 %                        |
| MAPbI <sub>3</sub><br>(Old crystal)    | 0.12                        | 15.06 %                     | 2.40                        | 16.82%                      | 12.4                        | 31.82 %                     | 111.0                       | 36.31 %                     |
| MAPbI <sub>3</sub><br>(Fresh crystal)  | 0.15                        | 15 %                        | 3.20                        | 17%                         | 14.0                        | 32 %                        | 117                         | 36 %                        |

\* The photoluminescence (PL) plots were fitted with a four-exponential decay.

## References

- 1 X. Guo, C. McCleese, C. Kolodziej, A. C. Samia, Y. Zhao, C. Burda, *Dalton Trans.* **2016**, 45, 3806-3813.
- 2 J. A. Christians, P. A. Miranda Herrera, P. V. Kamat, *J. Am. Chem. Soc.* **2015**, 137, 1530-1538.
- 3 S. A. Fateev, A. A. Petrov, V. N. Khrustalev, P. V. Dorovatovskii, Y. V. Zubavichus, E. A. Goodilin, A. B. Tarasov, *Chem. Mater.* **2018**, 30, 5237–5244.
- 4 D. Elwell, H. J. Scheel, *Crystal Growth from High-Temperature Solutions*, Academic Press Inc, London - New York 1975.
